# Supplementary material for: A strong dependency between changes in fluid and crystallized abilities in human cognitive aging
Source: PubMed Central journal article supplement — Sci Adv. 2022 Feb 2;8(5):eabj2422. doi: 10.1126/sciadv.abj2422 (PMC8809681; doi:10.1126/sciadv.abj2422), 2022-02-02
Supplement: sciadv.abj2422_sm.pdf [file sciadv.abj2422_sm.pdf]

Supplementary Materials for

**A strong dependency between changes in fluid and crystallized abilities in human cognitive aging**

Elliot M. Tucker-Drob\*, Javier de la Fuente, Ylva Köhncke, Andreas M. Brandmaier,  
Lars Nyberg, Ulman Lindenberger\*

\*Corresponding author. Email: tuckerdrob@utexas.edu (E.M.T.-D.); seklindenberger@mpib-berlin.mpg.de (U.L.)

Published 2 February 2022, *Sci. Adv.* **8**, eabj2422 (2022)  
DOI: 10.1126/sciadv.abj2422

**This PDF file includes:**

Figs. S1 to S8  
Tables S1 to S14

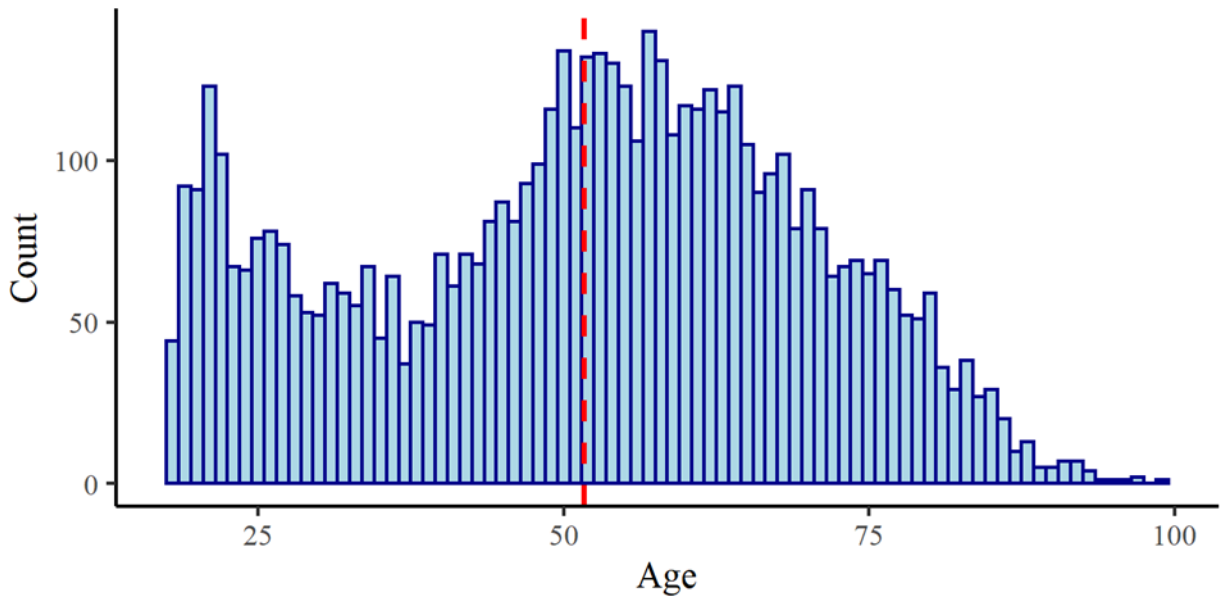

**Fig. S1.**

Age distribution at baseline ( $N = 5566$ ,  $M = 51.67$ ,  $SD = 18.08$ , range = 18–99 years) in VCAP.

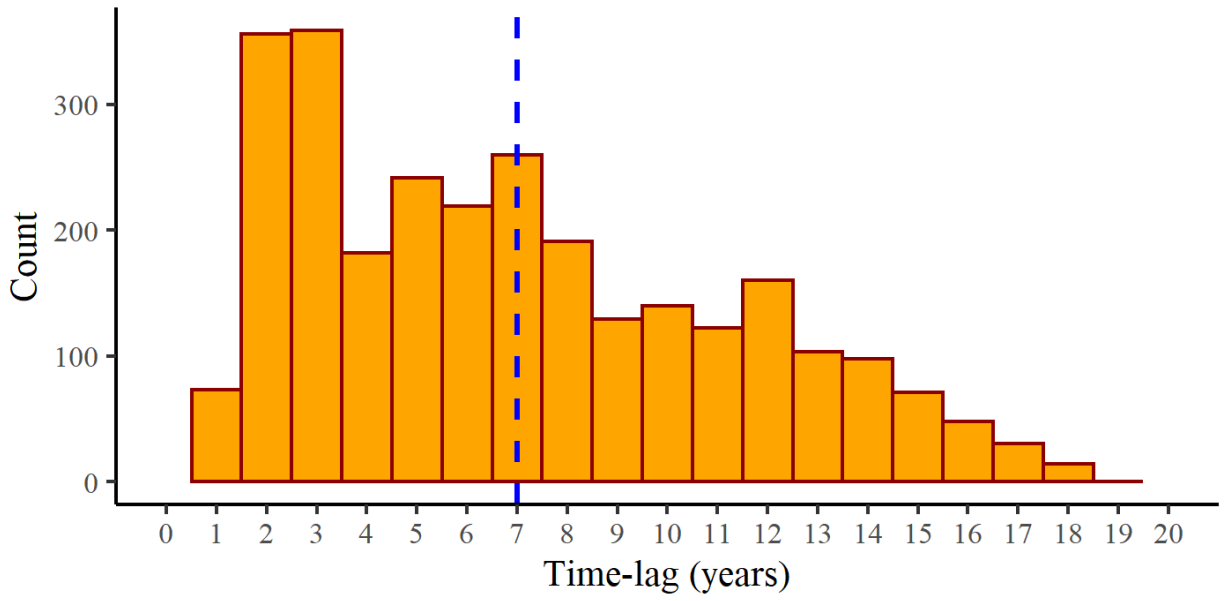

**Fig. S2.**

Time-lag distribution between baseline assessment and all subsequent assessments in VCAP (M = 7.00, SD = 4.21, range = 0.86–18.46 years).

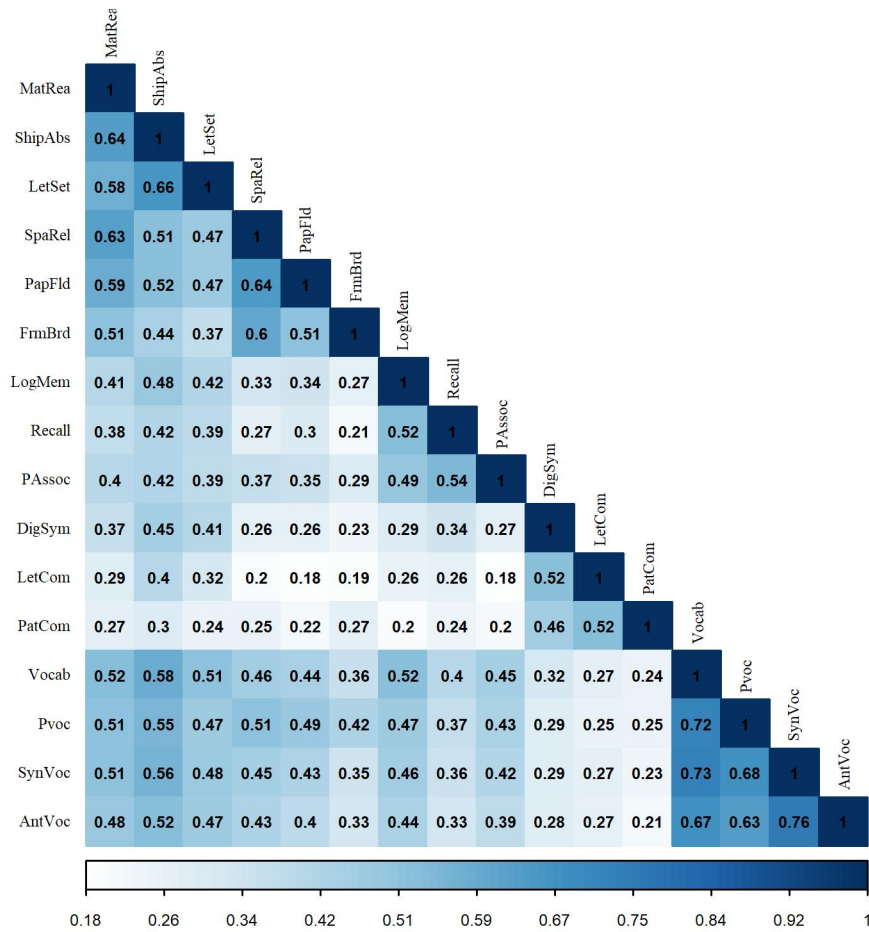

**Fig. S3.**

Heatmap of age-residualized correlations among VCAP test scores at baseline assessment.

*Scores at baseline were residualized for age and age-squared.*

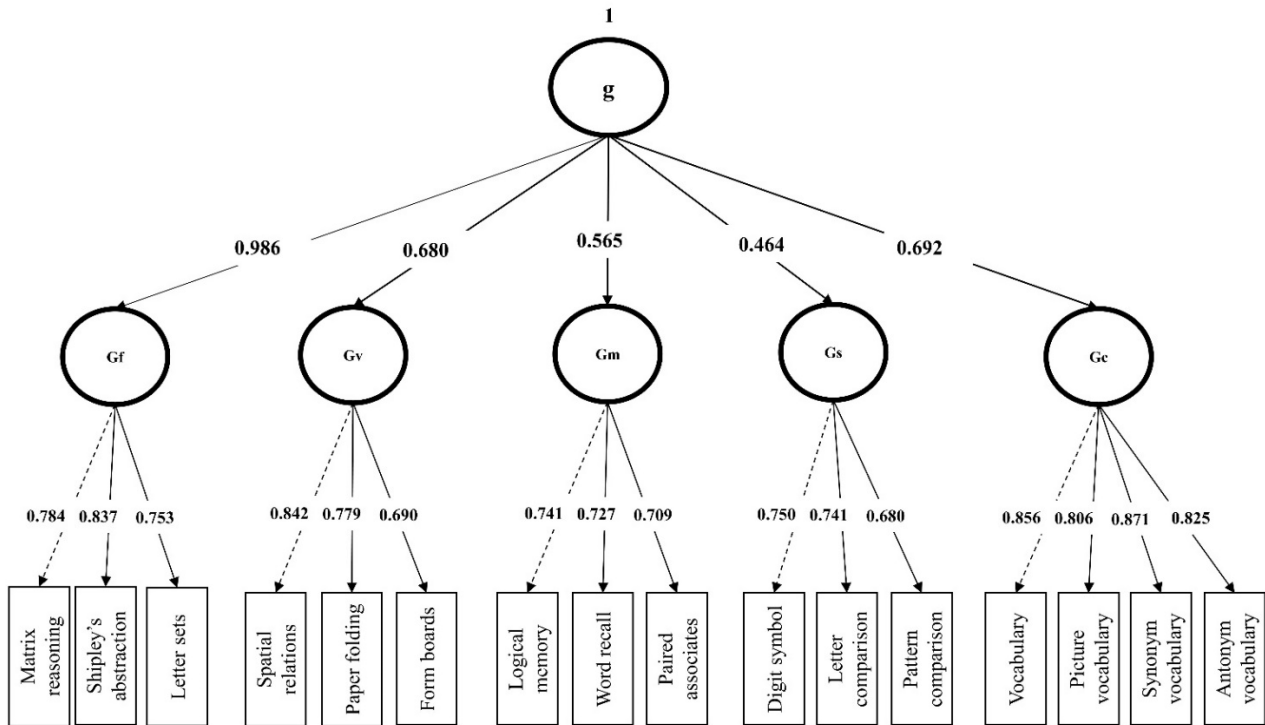

**Fig. S4.**

Fully standardized parameter estimates from age-residualized hierarchical common factor model of cognitive tests in VCAP at baseline. *Scores at baseline were residualized for age and age-squared.*

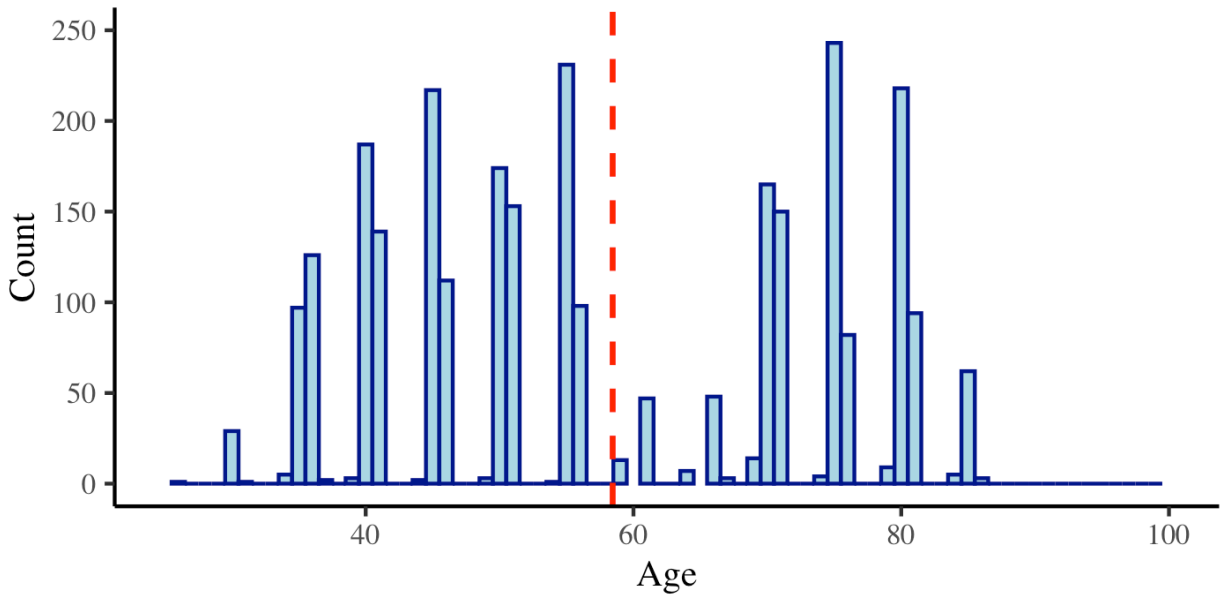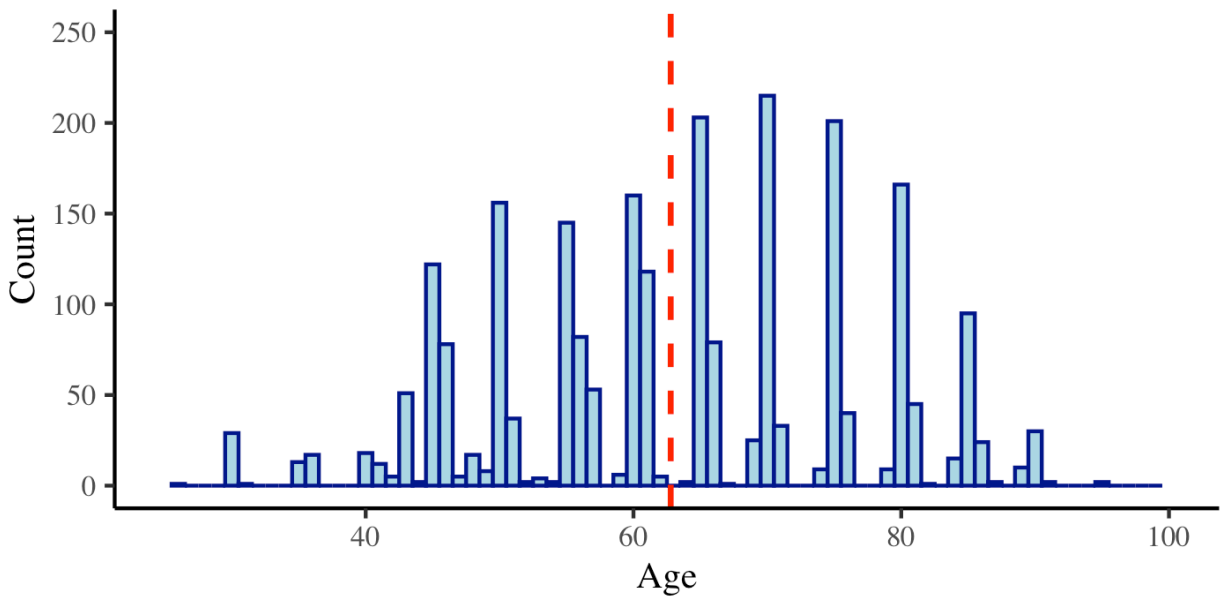

**Fig. S5.**

Age distributions at baseline in BETULA. Upper panel: Age distribution in tests for visuospatial reasoning, memory, and crystallized ability ( $M = 58.45$ ,  $SD = 14.73$ , range = 25–86 years).

Lower panel: Age distribution in test for perceptual speed ( $M = 62.78$ ,  $SD = 14.05$ , range = 25–95 years).

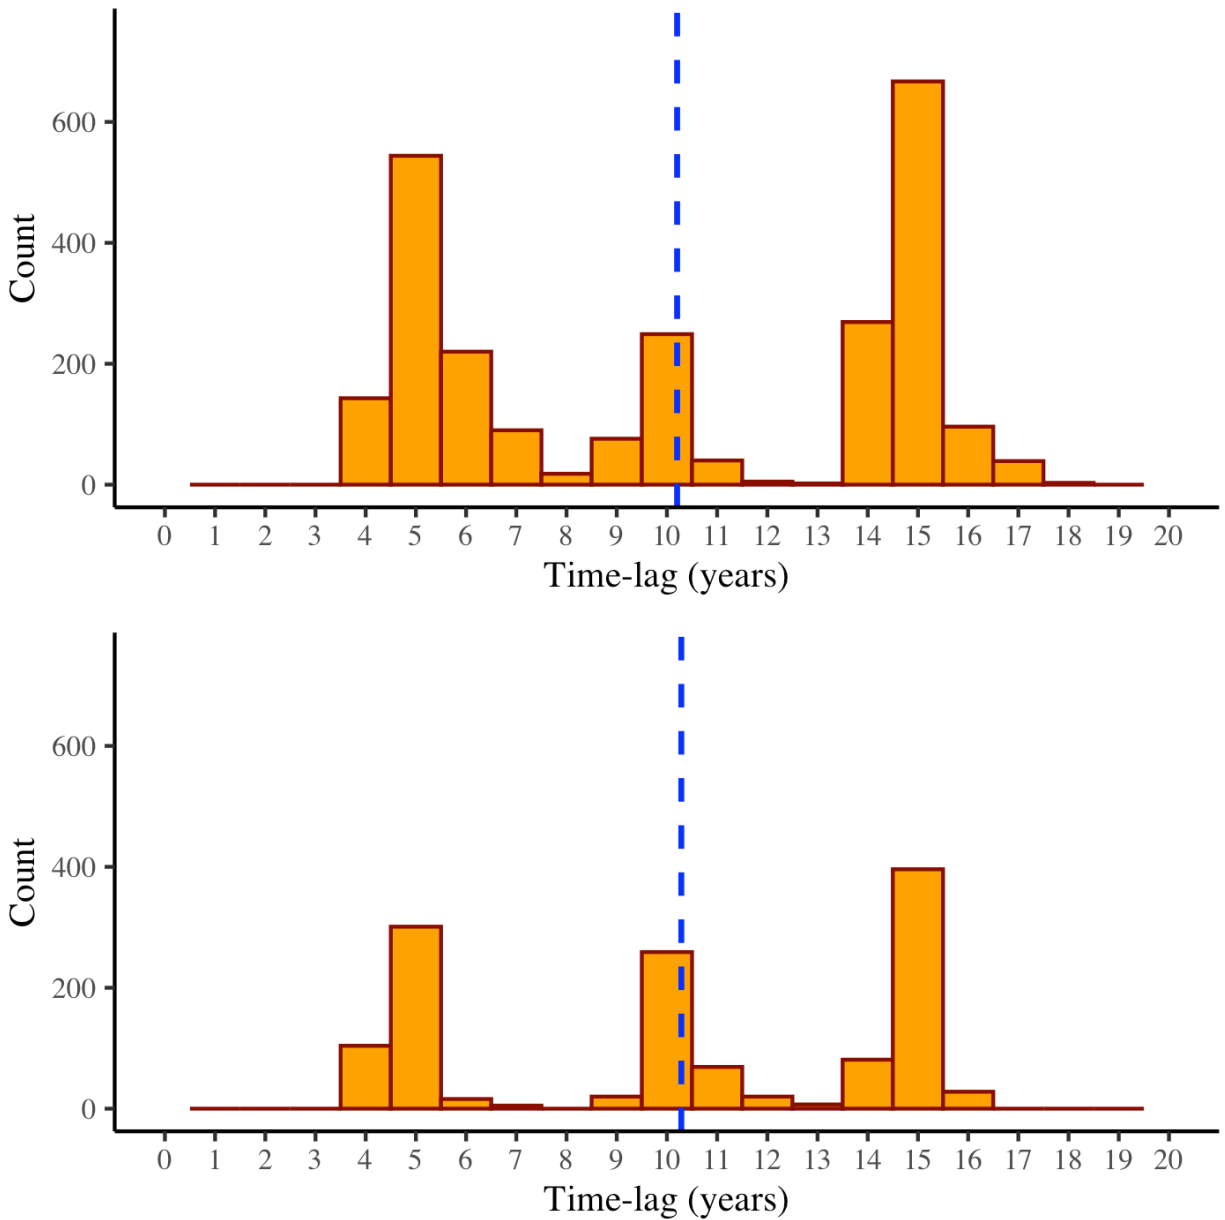

**Fig. S6.**

Time-lag distribution between baseline assessment and all subsequent assessments in BETULA.

Upper panel: Time-lag distribution in tests for visuospatial reasoning, memory, and crystallized ability ( $M = 10.20$ ,  $SD = 4.50$ , range = 4–18 years). Lower panel: Time-lag distribution in test

for perceptual speed ( $M = 10.29$ ,  $SD = 4.28$ , range = 4–16 years).

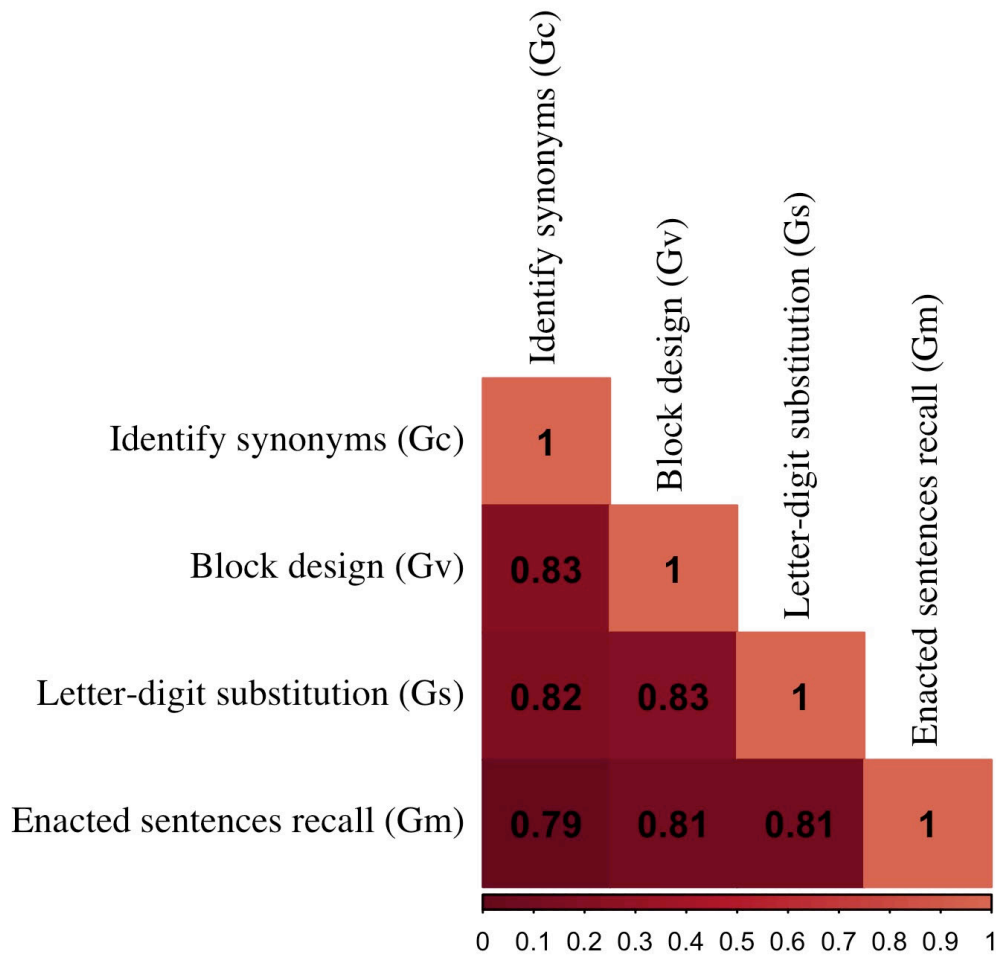

**Fig. S7.**

Heatmap of age-residualized correlations among standardized test scores at baseline assessment (T1) in BETULA. *Test scores at baseline were residualized by age and age-squared.*



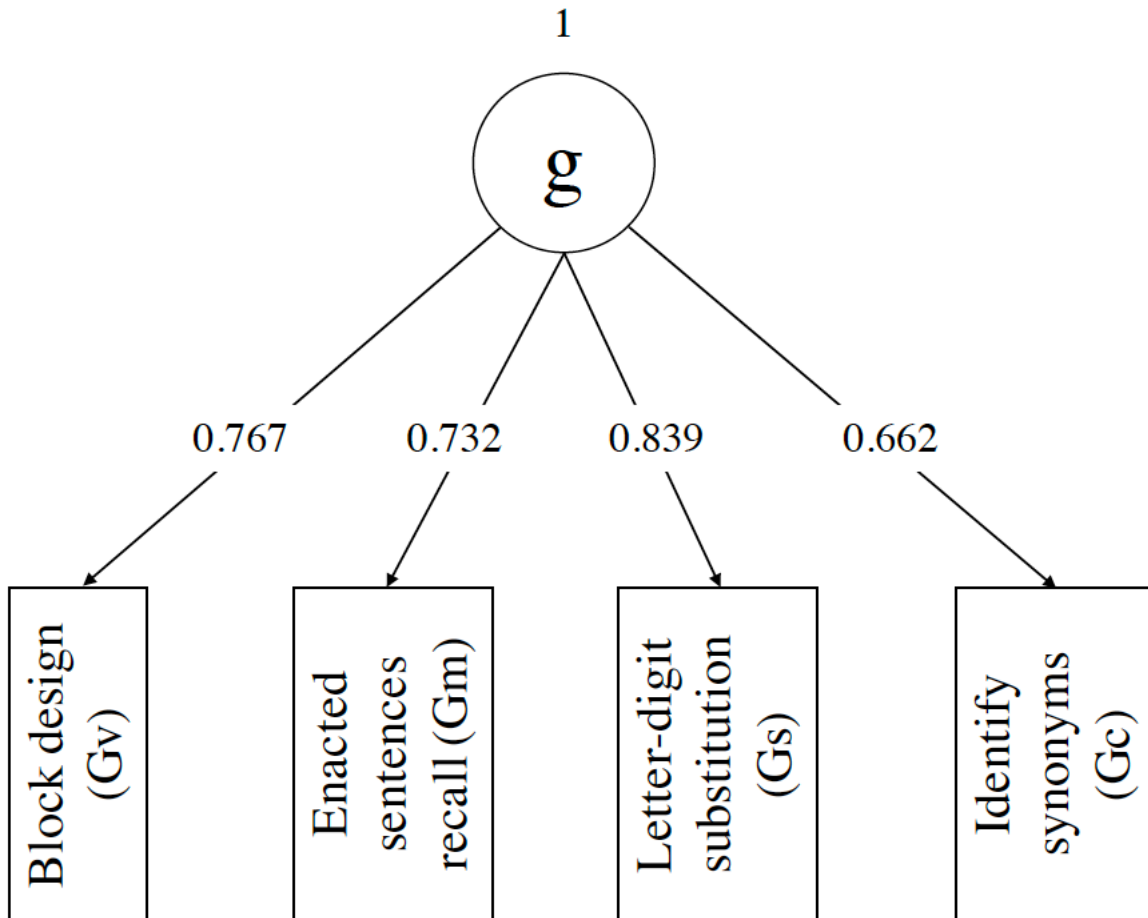

**Fig. S8.**

Fully standardized parameter estimates from age-residualized common factor model of cognitive tests at baseline (T1) in BETULA. *Test scores at baseline were residualized by age and age-squared.*

**Table S1.**

Sample size across assessments and cognitive tests in VCAP.

| Domain | Cognitive test        | Assessment |      |      |      |     |     |    |    |
|--------|-----------------------|------------|------|------|------|-----|-----|----|----|
|        |                       | T1         | T2   | T3   | T4   | T5  | T6  | T7 | T8 |
|        |                       | N          | N    | N    | N    | N   | N   | N  | N  |
| Gf     | Matrix reasoning      | 5435       | 2768 | 1639 | 1014 | 555 | 215 | 66 | 11 |
|        | Shipley's abstraction | 4665       | 2733 | 1636 | 1003 | 538 | 212 | 64 | 11 |
|        | Letter sets           | 4894       | 2552 | 1447 | 887  | 477 | 181 | 56 | 9  |
| Gv     | Spatial relations     | 5432       | 2751 | 1621 | 996  | 537 | 204 | 64 | 11 |
|        | Paper folding         | 5451       | 2768 | 1632 | 997  | 542 | 205 | 64 | 11 |
|        | Form boards           | 5105       | 2666 | 1560 | 964  | 525 | 205 | 61 | 11 |
| Gm     | Logical memory        | 5488       | 2759 | 1646 | 1014 | 545 | 213 | 65 | 11 |
|        | Word recall           | 5548       | 2792 | 1673 | 1022 | 555 | 214 | 67 | 11 |
|        | Paired associates     | 5063       | 2781 | 1665 | 1021 | 555 | 215 | 67 | 11 |
| Gs     | Digit symbol          | 5546       | 2792 | 1672 | 1017 | 555 | 214 | 67 | 11 |
|        | Letter comparison     | 5494       | 2788 | 1671 | 1019 | 555 | 215 | 67 | 11 |
|        | Pattern comparison    | 5491       | 2789 | 1672 | 1018 | 555 | 215 | 67 | 11 |
| Gc     | Vocabulary            | 5553       | 2780 | 1661 | 1013 | 548 | 214 | 67 | 10 |
|        | Picture vocabulary    | 5556       | 2793 | 1672 | 1022 | 554 | 215 | 66 | 11 |
|        | Synonym vocabulary    | 5423       | 2762 | 1658 | 1006 | 547 | 213 | 67 | 11 |
|        | Antonym vocabulary    | 5398       | 2759 | 1657 | 1007 | 547 | 213 | 67 | 11 |

**Table S2.**

Time-lag (years) since baseline assessment (T1) across follow-up assessments (T2–T8) in

VCAP.

|                     | Follow-up assessment |      |      |      |      |      |       |      |       |      |       |      |       |      |
|---------------------|----------------------|------|------|------|------|------|-------|------|-------|------|-------|------|-------|------|
|                     | T2                   |      | T3   |      | T4   |      | T5    |      | T6    |      | T7    |      | T8    |      |
| Years since         | M                    | SD   | M    | SD   | M    | SD   | M     | SD   | M     | SD   | M     | SD   | M     | SD   |
| Baseline (T1)       | 3.13                 | 1.89 | 6.04 | 2.09 | 8.55 | 2.16 | 11.35 | 2.38 | 13.35 | 2.04 | 14.82 | 2.31 | 15.43 | 1.18 |
| Previous assessment | 3.13                 | 1.89 | 3.23 | 1.62 | 2.80 | 1.18 | 3.09  | 1.34 | 3.11  | 1.13 | 2.06  | 0.53 | 3.00  | 1.65 |

**Table S3.**

Description of tasks in VCAP used in this study

| <b>Domain</b> | <b>Variable</b>       | <b>Description</b>                                                                                             |
|---------------|-----------------------|----------------------------------------------------------------------------------------------------------------|
| Gf            | Matrix reasoning      | Select the pattern that best completes the missing cell in a 3×3 matrix                                        |
|               | Shipley's abstraction | Determine the letters, words, or numbers that best complete a progressive sequence                             |
|               | Letter sets           | Identify which of five groups of letters follows a different pattern from the others                           |
| Gv            | Spatial relations     | Determine which three-dimensional object could be constructed by folding the two-dimensional object            |
|               | Paper folding         | Determine the location of holes that would result from a punch through a sequence of folds of a piece of paper |
|               | Form boards           | Determine which shapes are needed to fill in a target space                                                    |
| Gm            | Logical memory        | Remember as many idea units as possible from three stories                                                     |
|               | Word recall           | Recall as many words as possible across four-word list trials                                                  |
| Gs            | Paired associates     | Recall the second words from word pairs                                                                        |
|               | Digit symbol          | Use a code table to write the corresponding symbol below each digit                                            |
|               | Letter comparison     | Compare pairs of letter strings and judge whether they are the same or different                               |
| Gc            | Pattern comparison    | Compare pairs of line patterns and judge whether they are the same or different                                |
|               | Vocabulary            | Define words out loud                                                                                          |
|               | Picture vocabulary    | Name the objects pictured                                                                                      |
|               | Synonym vocabulary    | Choose the word most similar in meaning to the target                                                          |
|               | Antonym vocabulary    | Choose the word most opposite in meaning to the target                                                         |

*Note:* This table was adapted from (50).

**Table S4.**

Description of tasks in BETULA used in this study

| <b>Domain</b> | <b>Variable</b>           | <b>Description</b>                                                                                     |
|---------------|---------------------------|--------------------------------------------------------------------------------------------------------|
| Gv            | Block design              | Place red and white blocks to form a target pattern                                                    |
| Gm            | Enacted sentences recall  | Recall two-word sentences from a list of 16 that have been enacted just before (e.g., "roll the ball") |
| Gs            | Letter-digit substitution | Use a code table to write down letter corresponding to each digit                                      |
| Gc            | Identify synonyms         | Underline the synonym to a target word in a row of five words written next to the target word          |

**Table S5.**

Sample size across assessments and cognitive tests in BETULA.

| Domain | Cognitive Test            | Assessment |         |         |         |
|--------|---------------------------|------------|---------|---------|---------|
|        |                           | T1<br>N    | T2<br>N | T3<br>N | T4<br>N |
| Gv     | Block design              | 3317       | 2259    | 1214    | 891     |
| Gm     | Enacted sentences recall  | 3319       | 2270    | 1218    | 900     |
| Gs     | Letter-digit substitution | 2387       | 1140    | 740     | 459     |
| Gc     | Identify synonyms         | 3319       | 2322    | 1272    | 969     |

**Table S6.**

Time-lag (years) since baseline assessment (T1) across follow-up assessments (T2–T4) in  
BETULA.

| Years since                       | T2   |      | T3    |      | T4    |      |
|-----------------------------------|------|------|-------|------|-------|------|
|                                   | M    | SD   | M     | SD   | M     | SD   |
| Baseline (T1) in Gv, Gm, Gc       | 5.11 | 0.67 | 9.92  | 0.58 | 14.92 | 0.71 |
| Previous assessment in Gv, Gm, Gc | 5.11 | 0.67 | 4.95  | 0.47 | 4.98  | 0.54 |
| Baseline (T1) in Gs               | 4.87 | 0.50 | 10.17 | 0.56 | 14.89 | 0.46 |
| Previous assessment in Gs         | 4.87 | 0.50 | 5.26  | 0.50 | 4.81  | 0.41 |

**Table S7.** Parameter estimates from time-based factor of curves models in VCAP with constant retest specification.

| Cognitive domain | Latent variable means (SE) |                   |                   |                   | Unstandardized loadings (SE) |                  |                  | Standardized loadings |                  |                  | Residual variances and covariances (SE) |                  |                  |                  |                   |                   |                   |
|------------------|----------------------------|-------------------|-------------------|-------------------|------------------------------|------------------|------------------|-----------------------|------------------|------------------|-----------------------------------------|------------------|------------------|------------------|-------------------|-------------------|-------------------|
|                  | $\mu_r$                    | $\mu_i$           | $\mu_s$           | $\mu_q$           | $F_i$                        | $F_s$            | $F_q$            | $F_i$                 | $F_s$            | $F_q$            | $\sigma^2_{e[t]}$                       | $\sigma^2_{ui}$  | $\sigma^2_{us}$  | $\sigma^2_{uq}$  | $\sigma_{ui,us}$  | $\sigma_{ui,uq}$  | $\sigma_{us,uq}$  |
| $G_f^a$          | 0.082<br>(0.015)           | -0.016<br>(0.013) | -0.092<br>(0.051) | -0.038<br>(0.034) | 0.905<br>(0.010)             | 0.542<br>(0.040) | 0.317<br>(0.036) | 0.980<br>(0.005)      | 0.830<br>(0.035) | 0.894<br>(0.027) | 0.109<br>(0.004)                        | 0.033<br>(0.008) | 0.132<br>(0.030) | 0.025<br>(0.004) | -0.048<br>(0.018) | 0.019<br>(0.013)  | -0.056<br>(0.012) |
| $G_v^a$          | 0.061<br>(0.015)           | -0.006<br>(0.013) | 0.088<br>(0.049)  | -0.095<br>(0.033) | 0.755<br>(0.009)             | 0.529<br>(0.044) | 0.326<br>(0.036) | 0.841<br>(0.006)      | 0.954<br>(0.048) | 0.962<br>(0.010) | 0.103<br>(0.004)                        | 0.236<br>(0.008) | 0.027<br>(0.031) | 0.009<br>(0.002) | -0.035<br>(0.018) | 0.022<br>(0.012)  | -0.013<br>(0.012) |
| $G_m^a$          | 0.038<br>(0.017)           | 0.001<br>(0.012)  | -0.004<br>(0.058) | -0.063<br>(0.039) | 0.645<br>(0.011)             | 0.811<br>(0.045) | 0.490<br>(0.042) | 0.761<br>(0.008)      | 0.893<br>(0.029) | 0.972<br>(0.005) | 0.122<br>(0.005)                        | 0.303<br>(0.010) | 0.167<br>(0.049) | 0.014<br>(0.001) | -0.071<br>(0.023) | 0.014<br>(0.017)  | -0.048<br>(0.017) |
| $G_s^a$          | 0.038<br>(0.018)           | 0.001<br>(0.014)  | -0.176<br>(0.057) | -0.087<br>(0.038) | 0.694<br>(0.013)             | 0.655<br>(0.048) | 0.399<br>(0.040) | 0.712<br>(0.009)      | 0.974<br>(0.044) | 0.975<br>(0.015) | 0.131<br>(0.006)                        | 0.469<br>(0.014) | 0.023<br>(0.041) | 0.008<br>(0.005) | 0.050<br>(0.031)  | -0.035<br>(0.024) | -0.001<br>(0.015) |
| $G_c^b$          | 0.006<br>(0.011)           | -0.003<br>(0.011) | 0.083<br>(0.032)  | -0.062<br>(0.021) | 0.446<br>(0.011)             | 0.330<br>(0.022) | 0.194<br>(0.018) | 0.502<br>(0.010)      | 0.940<br>(0.058) | 0.946<br>(0.009) | 0.050<br>(0.003)                        | 0.590<br>(0.011) | 0.014<br>(0.015) | 0.004<br>(0.000) | -0.071<br>(0.016) | 0.026<br>(0.013)  | -0.007<br>(0.005) |

$\rho_{F_i,F_s}^a=0.239$  ( $p<0.001$ ),  $\rho_{F_i,F_q}^a=-0.137$  ( $p=0.011$ ),  $\rho_{F_s,F_q}^a=-0.897$  ( $p<0.001$ ).

1. The variance of  $F_i$ ,  $F_s$  and  $F_q$  were fixed to 1.0 to define the metrics of the latent growth factors.

2. We specified time-based growth curve modelling, such that the basis coefficients for each of the five slopes were set to the time in decades from baseline to each assessment on variable  $w$ .

3. Each of the five cognitive outcomes was standardized by subtracting the mean of all datapoints at the baseline occasion and dividing by the standard deviation of the age and age<sup>2</sup> residuals of all the datapoints at baseline.

<sup>a</sup> 1<sup>st</sup> step: unconstrained factor of curves model excluding  $G_c$ .

<sup>b</sup> 2<sup>nd</sup> step: constrained factor of curves model including  $G_c$ .



**Table S8.** Parameter estimates from age-based factor of curves models in VCAP with logarithmic retest specification.

| Cognitive domain | Latent variable means (SE) |                  |                   |                   | Unstandardized loadings (SE) |                  |                  | Standardized loadings |                      |                  | Residual variances and covariances (SE) |                   |                  |                  |                   |                   |                   |
|------------------|----------------------------|------------------|-------------------|-------------------|------------------------------|------------------|------------------|-----------------------|----------------------|------------------|-----------------------------------------|-------------------|------------------|------------------|-------------------|-------------------|-------------------|
|                  | $\mu_r$                    | $\mu_i$          | $\mu_s$           | $\mu_q$           | $F_i$                        | $F_s$            | $F_q$            | $F_i$                 | $F_s$                | $F_q$            | $\sigma^2_{e[t]}$                       | $\sigma^2_{ui}$   | $\sigma^2_{us}$  | $\sigma^2_{uq}$  | $\sigma_{ui,us}$  | $\sigma_{ui,uq}$  | $\sigma_{us,uq}$  |
| $G_f^a$          | 0.188<br>(0.009)           | 0.188<br>(0.015) | -0.229<br>(0.006) | -0.046<br>(0.003) | 0.879<br>(0.016)             | 0.213<br>(0.020) | 0.057<br>(0.006) | 1.014<br>(0.007)      | 1<br>(0.092)         | 0.959<br>(0.014) | 0.114<br>(0.003)                        | -0.021<br>(0.011) | 0.000<br>(0.008) | 0.000<br>(0.000) | 0.008<br>(0.003)  | -0.002<br>(0.004) | 0.000<br>(0.000)  |
| $G_v^a$          | 0.245<br>(0.008)           | 0.110<br>(0.015) | -0.233<br>(0.006) | -0.021<br>(0.003) | 0.700<br>(0.014)             | 0.133<br>(0.017) | 0.045<br>(0.007) | .816<br>(0.009)       | 0.898<br>(0.191)     | 0.972<br>(0.012) | 0.106<br>(0.004)                        | 0.247<br>(0.011)  | 0.004<br>(0.009) | 0.000<br>(0.000) | -0.017<br>(0.003) | -0.003<br>(0.005) | 0.000<br>(0.000)  |
| $G_m^a$          | 0.200<br>(0.011)           | 0.197<br>(0.015) | -0.210<br>(0.006) | -0.047<br>(0.003) | 0.581<br>(0.017)             | 0.153<br>(0.014) | 0.056<br>(0.005) | 0.727<br>(0.014)      | 0.773<br>(0.119)     | 0.866<br>(0.037) | 0.135<br>(0.004)                        | 0.302<br>(0.013)  | 0.016<br>(0.012) | 0.001<br>(0.000) | 0.002<br>(0.004)  | -0.014<br>(0.006) | -0.001<br>(0.001) |
| $G_s^a$          | 0.160<br>(0.010)           | 0.212<br>(0.014) | -0.344<br>(0.006) | -0.045<br>(0.003) | 0.453<br>(0.017)             | 0.145<br>(0.012) | 0.043<br>(0.005) | 0.584<br>(0.017)      | 0.833<br>(0.181)     | 0.872<br>(0.061) | 0.133<br>(0.005)                        | 0.397<br>(0.014)  | 0.009<br>(0.013) | 0.001<br>(0.000) | -0.029<br>(0.005) | -0.009<br>(0.006) | 0.001<br>(0.001)  |
| $G_c^b$          | -0.009<br>(0.006)          | 0.121<br>(0.010) | 0.120<br>(0.004)  | -0.039<br>(0.002) | 0.725<br>(0.012)             | 0.130<br>(0.006) | 0.045<br>(0.003) | 0.782<br>(0.008)      | 0.957<br>(0.129)     | 0.931<br>(0.033) | 0.049<br>(0.002)                        | 0.333<br>(0.012)  | 0.002<br>(0.005) | 0.000<br>(0.000) | -0.007<br>(0.003) | -0.006<br>(0.003) | 0.000<br>(0.000)  |
|                  | Retest Basis coefficients  |                  |                   |                   |                              |                  |                  |                       | Implied retest means |                  |                                         |                   |                  |                  |                   |                   |                   |
|                  | T1                         | T2               | T3                | T4                | T5                           | T6               | T7               | T8                    | T1                   | T2               | T3                                      | T4                | T5               | T6               | T7                | T8                |                   |
| $G_f^a$          | 0                          | 0.693            | 1.099             | 1.386             | 1.609                        | 1.792            | 1.946            | 2.079                 | 0                    | 0.130            | 0.207                                   | 0.261             | 0.302            | 0.337            | 0.366             | 0.391             |                   |
| $G_v^a$          | 0                          | 0.693            | 1.099             | 1.386             | 1.609                        | 1.792            | 1.946            | 2.079                 | 0                    | 0.170            | 0.269                                   | 0.340             | 0.394            | 0.439            | 0.477             | 0.509             |                   |
| $G_m^a$          | 0                          | 0.693            | 1.099             | 1.386             | 1.609                        | 1.792            | 1.946            | 2.079                 | 0                    | 0.139            | 0.220                                   | 0.277             | 0.322            | 0.358            | 0.389             | 0.416             |                   |
| $G_s^a$          | 0                          | 0.693            | 1.099             | 1.386             | 1.609                        | 1.792            | 1.946            | 2.079                 | 0                    | 0.111            | 0.176                                   | 0.222             | 0.257            | 0.287            | 0.311             | 0.333             |                   |
| $G_c^b$          | 0                          | 0.693            | 1.099             | 1.386             | 1.609                        | 1.792            | 1.946            | 2.079                 | 0                    | -0.006           | -0.010                                  | -0.012            | -0.014           | -0.016           | -0.018            | -0.019            |                   |

$\rho_{F_i,F_s}^a = -0.098$  ( $p=0.031$ ),  $\rho_{F_i,F_q}^a = -0.913$  ( $p<0.001$ ),  $\rho_{F_s,F_q}^a = 0.116$  ( $p=0.240$ ).

1. The variance of  $F_i$ ,  $F_s$  and  $F_q$  were fixed to 1.0 to define the metrics of the latent growth factors.
2. We specified age-based growth curve modelling, such that the basis coefficients for each of the five slopes were set to the age in decades of individual  $n$  at each assessment on variable  $w$ , centered at 50 years.
3. Each of the five cognitive outcomes was standardized by subtracting the mean of all datapoints at the baseline occasion and dividing by the standard deviation of the age and age<sup>2</sup> residuals of all the datapoints at baseline.

<sup>a</sup> 1<sup>st</sup> step: unconstrained factor of curves model excluding  $G_c$ .

<sup>b</sup> 2<sup>nd</sup> step: constrained factor of curves model including  $G_c$ .

**Table S9.** Parameter estimates from age-based factor of curves models in VCAP with latent basis retest specification.

| Cognitive domain   | Latent variable means (SE) |                  |                |                | Unstandardized loadings (SE) |               |                | Standardized loadings |                  |                  | Residual variances and covariances (SE) |                   |                  |                  |                   |                   |                   |
|--------------------|----------------------------|------------------|----------------|----------------|------------------------------|---------------|----------------|-----------------------|------------------|------------------|-----------------------------------------|-------------------|------------------|------------------|-------------------|-------------------|-------------------|
|                    | $\mu_r$                    | $\mu_i$          | $\mu_s$        | $\mu_q$        | $F_i$                        | $F_s$         | $F_q$          | $F_i$                 | $F_s$            | $F_q$            | $\sigma^2_{e[t]}$                       | $\sigma^2_{ui}$   | $\sigma^2_{us}$  | $\sigma^2_{uq}$  | $\sigma_{ui,us}$  | $\sigma_{ui,uq}$  | $\sigma_{us,uq}$  |
| $G_f^a$            | 0.125<br>(0.009)           | 0.194<br>(0.015) | -0.235 (0.007) | -0.048 (0.003) | 0.881 (0.016)                | 0.212 (0.021) | 0.057 (0.007)  | 1.013 (0.007)         | 1.001<br>(0.099) | 0.959<br>(0.014) | 0.113<br>(0.003)                        | -0.020<br>(0.011) | 0.000<br>(0.009) | 0.000<br>(0.000) | 0.008<br>(0.003)  | -0.002<br>(0.004) | 0.000<br>(0.000)  |
| $G_v^a$            | 0.148<br>(0.009)           | 0.118<br>(0.015) | -0.238 (0.006) | -0.023 (0.003) | 0.703 (0.013)                | 0.133 (0.017) | 0.045 (0.007)  | 0.816 (0.009)         | 0.897<br>(0.215) | 0.973<br>(0.012) | 0.105<br>(0.003)                        | 0.247<br>(0.011)  | 0.004<br>(0.010) | 0.000<br>(0.000) | -0.018<br>(0.003) | -0.003<br>(0.005) | 0.000<br>(0.000)  |
| $G_m^a$            | 0.101<br>(0.010)           | 0.214<br>(0.015) | -0.217 (0.006) | -0.050 (0.003) | 0.588 (0.017)                | 0.151 (0.015) | 0.056 (0.005)  | 0.730 (0.013)         | 0.766<br>(0.133) | 0.870<br>(0.036) | 0.136<br>(0.004)                        | 0.303<br>(0.013)  | 0.016<br>(0.013) | 0.001<br>(0.000) | 0.002<br>(0.004)  | -0.015<br>(0.006) | -0.001<br>(0.001) |
| $G_s^a$            | 0.090<br>(0.010)           | 0.220<br>(0.014) | -0.349 (0.006) | -0.047 (0.003) | 0.455 (0.017)                | 0.145 (0.012) | 0.043 (0.005)  | 0.585 (0.017)         | 0.834<br>(0.195) | 0.876<br>(0.061) | 0.134<br>(0.005)                        | 0.398<br>(0.015)  | 0.009<br>(0.014) | 0.001<br>(0.000) | -0.028<br>(0.005) | -0.009<br>(0.007) | 0.001<br>(0.001)  |
| $G_c^b$            | -0.001<br>(0.001)          | 0.121<br>(0.010) | 0.116 (0.004)  | -0.040 (0.002) | 0.725 (0.012)                | 0.131 (0.006) | 0.044 (0.003)  | 0.782 (0.008)         | 0.960<br>(0.145) | 0.929<br>(0.036) | 0.046<br>(0.003)                        | 0.334<br>(0.012)  | 0.001<br>(0.006) | 0.000<br>(0.000) | -0.007<br>(0.005) | -0.005<br>(0.005) | 0.000<br>(0.040)  |
| Basis coefficients |                            |                  |                |                |                              |               |                | Implied retest means  |                  |                  |                                         |                   |                  |                  |                   |                   |                   |
|                    | T1                         | T2               | T3             | T4             | T5                           | T6            | T7             | T8                    |                  | T1               | T2                                      | T3                | T4               | T5               | T6                | T7                | T8                |
| $G_f^a$            | 0                          | 1.000            | 1.710 (0.084)  | 2.062 (0.102)  | 2.631 (0.136)                | 3.169 (0.216) | 3.950 (0.382)  | 4.391 (0.713)         |                  | 0                | 0.125                                   | 0.214             | 0.258            | 0.329            | 0.396             | 0.494             | 0.549             |
| $G_v^a$            | 0                          | 1.000            | 1.904 (0.070)  | 2.396 (0.080)  | 2.764 (0.104)                | 3.239 (0.182) | 4.191 (0.851)  | 3.623 (0.512)         |                  | 0                | 0.148                                   | 0.282             | 0.355            | 0.409            | 0.479             | 0.620             | 0.536             |
| $G_m^a$            | 0                          | 1.000            | 2.129 (0.106)  | 3.114 (0.125)  | 3.958 (0.160)                | 4.651 (0.261) | 5.468 (0.410)  | 4.758 (0.864)         |                  | 0                | 0.101                                   | 0.215             | 0.315            | 0.400            | 0.470             | 0.552             | 0.481             |
| $G_s^a$            | 0                          | 1.000            | 1.995 (0.122)  | 2.749 (0.145)  | 3.086 (0.172)                | 3.780 (0.328) | 3.779 (0.410)  | 2.494 (1.867)         |                  | 0                | 0.090                                   | 0.180             | 0.247            | 0.278            | 0.340             | 0.340             | 0.224             |
| $G_c^b$            | 0                          | 1.000            | 9.524 (7.854)  | -5.470 (4.347) | 3.594 (2.326)                | 5.019 (6.854) | -1.853 (5.057) | -4.687 (5.617)        |                  | 0                | -0.001                                  | -0.010            | 0.005            | -0.004           | -0.005            | 0.002             | 0.005             |

$\rho_{F_i, F_s}^a = -0.096$  ( $p=0.034$ ),  $\rho_{F_i, F_q}^a = -0.922$  ( $p<0.001$ ),  $\rho_{F_s, F_q}^a = 0.106$  ( $p=0.277$ ).

1. The variance of  $F_i$ ,  $F_s$  and  $F_q$  were fixed to 1.0 to define the metrics of the latent growth factors.

2. We specified age-based growth curve modelling, such that the slope basis coefficients for each of the five slopes were set to the age in decades of individual  $n$  at each assessment on variable  $w$ , centered at 50 years.

3. Each of the five cognitive outcomes was standardized by subtracting the mean of all datapoints at the baseline occasion and dividing by the standard deviation of the age and age<sup>2</sup> residuals of all the datapoints at baseline.

<sup>a</sup> 1<sup>st</sup> step: unconstrained factor of curves model excluding  $G_c$ .

<sup>b</sup> 2<sup>nd</sup> step: constrained factor of curves model including  $G_c$ .

**Table S10.** Parameter estimates from age-based factor of curves models in VCAP with constant retest specification for observations made at ages less than or equal to age 65 years.

| Cognitive domain | Latent variable means (SE) |                   |                   |                   | Unstandardized loadings (SE) |                  |                  | Standardized loadings |                  |                  | Residual variances and covariances (SE) |                   |                  |                  |                   |                   |                   |
|------------------|----------------------------|-------------------|-------------------|-------------------|------------------------------|------------------|------------------|-----------------------|------------------|------------------|-----------------------------------------|-------------------|------------------|------------------|-------------------|-------------------|-------------------|
|                  | $\mu_r$                    | $\mu_i$           | $\mu_s$           | $\mu_q$           | $F_i$                        | $F_s$            | $F_q$            | $F_i$                 | $F_s$            | $F_q$            | $\sigma^2_{e[t]}$                       | $\sigma^2_{ui}$   | $\sigma^2_{us}$  | $\sigma^2_{uq}$  | $\sigma_{ui,us}$  | $\sigma_{ui,uq}$  | $\sigma_{us,uq}$  |
| $G_f^a$          | 0.126<br>(0.010)           | 0.200<br>(0.018)  | -0.134<br>(0.009) | -0.006<br>(0.006) | 0.864<br>(0.018)             | 0.239<br>(0.019) | 0.063<br>(0.017) | 1.006<br>(0.009)      | 0.999<br>(0.101) | 0.902<br>(0.060) | 0.108<br>(0.004)                        | -0.009<br>(0.014) | 0.000<br>(0.012) | 0.001<br>(0.000) | 0.006<br>(0.004)  | -0.003<br>(0.006) | 0.001<br>(0.001)  |
| $G_v^a$          | 0.200<br>(0.011)           | 0.148<br>(0.019)  | -0.166<br>(0.010) | 0.010<br>(0.006)  | 0.709<br>(0.015)             | 0.203<br>(0.021) | 0.044<br>(0.022) | 0.813<br>(0.011)      | 0.848<br>(0.093) | 0.773<br>(0.186) | 0.108<br>(0.006)                        | 0.259<br>(0.014)  | 0.016<br>(0.011) | 0.001<br>(0.001) | -0.017<br>(0.005) | -0.012<br>(0.006) | 0.002<br>(0.001)  |
| $G_m^a$          | 0.150<br>(0.012)           | 0.189<br>(0.018)  | -0.126<br>(0.009) | -0.001<br>(0.006) | 0.589<br>(0.019)             | 0.205<br>(0.039) | 0.078<br>(0.015) | 0.728<br>(0.016)      | 0.781<br>(0.118) | 0.829<br>(0.059) | 0.132<br>(0.005)                        | 0.308<br>(0.016)  | 0.027<br>(0.014) | 0.003<br>(0.001) | 0.003<br>(0.006)  | -0.027<br>(0.007) | -0.001<br>(0.002) |
| $G_s^a$          | 0.121<br>(0.012)           | 0.353<br>(0.018)  | -0.277<br>(0.009) | -0.032<br>(0.006) | 0.453<br>(0.024)             | 0.187<br>(0.036) | 0.061<br>(0.016) | 0.564<br>(0.022)      | 0.842<br>(0.147) | 0.826<br>(0.088) | 0.142<br>(0.007)                        | 0.439<br>(0.019)  | 0.014<br>(0.015) | 0.002<br>(0.001) | -0.025<br>(0.008) | -0.022<br>(0.008) | 0.001<br>(0.002)  |
| $G_c^b$          | -0.014<br>(0.007)          | -0.004<br>(0.013) | 0.167<br>(0.006)  | -0.030<br>(0.004) | 0.719<br>(0.014)             | 0.128<br>(0.010) | 0.044<br>(0.005) | 0.764<br>(0.010)      | 0.895<br>(0.114) | 0.803<br>(0.063) | 0.044<br>(0.002)                        | 0.368<br>(0.014)  | 0.004<br>(0.005) | 0.001<br>(0.000) | 0.000<br>(0.004)  | -0.015<br>(0.003) | 0.000<br>(0.001)  |

$\rho_{F_i,F_s}^a=0.014$  ( $p=0.757$ ),  $\rho_{F_i,F_q}^a=-0.867$  ( $p<0.001$ ),  $\rho_{F_s,F_q}^a=0.077$  ( $p=0.524$ ).

1. The variance of  $F_i$ ,  $F_s$  and  $F_q$  were fixed to 1.0 to define the metrics of the latent growth factors.
2. We specified age-based growth curve modelling, such that the basis coefficients for each of the five slopes were set to the age in decades of individual  $n$  at each assessment on variable  $w$ , centered at 44.53 years (mean age at baseline for the subsample of observations made at ages less than or equal to years old).
3. Each of the five cognitive outcomes was standardized by subtracting the mean of all datapoints at the baseline occasion and dividing by the standard deviation of the age and age<sup>2</sup> residuals of all the datapoints at baseline.

<sup>a</sup> 1<sup>st</sup> step: unconstrained factor of curves model excluding  $G_c$ .

<sup>b</sup> 2<sup>nd</sup> step: constrained factor of curves model including  $G_c$ .

**Table S11.** Parameter estimates from time-based factor of curves models in BETULA with constant retest specification.

| Cognitive domain | Latent variable means (SE) |                   |                  |                   | Unstandardized loadings (SE) |                  |                   | Standardized loadings |                  |                  | Residual variances and covariances (SE) |                  |                  |                  |                   |                  |                   |
|------------------|----------------------------|-------------------|------------------|-------------------|------------------------------|------------------|-------------------|-----------------------|------------------|------------------|-----------------------------------------|------------------|------------------|------------------|-------------------|------------------|-------------------|
|                  | $\mu_r$                    | $\mu_i$           | $\mu_s$          | $\mu_q$           | $F_i$                        | $F_s$            | $F_q$             | $F_i$                 | $F_s$            | $F_q$            | $\sigma^2_{e[t]}$                       | $\sigma^2_{ui}$  | $\sigma^2_{us}$  | $\sigma^2_{uq}$  | $\sigma_{ui,us}$  | $\sigma_{ui,uq}$ | $\sigma_{us,uq}$  |
| $G_v^a$          | -0.078<br>(0.015)          | -0.001<br>(0.022) | -0.43<br>(0.344) | -0.791<br>(0.442) | 0.95<br>(0.018)              | 0.823<br>(0.042) | 0.098<br>(0.021)  | 0.812<br>(0.01)       | 0.479<br>(0.021) | 0.047<br>(0.01)  | 0.253<br>(0.007)                        | 0.464<br>(0.022) | 2.273<br>(0.102) | 4.432<br>(0.198) | -0.238<br>(0.073) | 0.279<br>(0.102) | -3.165<br>(0.142) |
| $G_m^a$          | -0.109<br>(0.084)          | 0.000<br>(0.022)  | 0.222<br>(0.496) | -1.558<br>(0.637) | 0.887<br>(0.02)              | 0.824<br>(0.059) | 0.1<br>(0.042)    | 0.864<br>(0.011)      | 0.814<br>(0.024) | 0.145<br>(0.025) | 0.52<br>(0.012)                         | 0.268<br>(0.019) | 0.345<br>(0.034) | 0.470<br>(0.06)  | -0.034<br>(0.02)  | 0.059<br>(0.025) | -0.369<br>(0.045) |
| $G_s^a$          | 0.175<br>(0.067)           | -0.178<br>(0.029) | -2.12<br>(0.421) | -0.038<br>(0.548) | 1.332<br>(0.025)             | 1.301<br>(0.072) | 0.423<br>(0.056)  | 0.928<br>(0.008)      | 0.933<br>(0.009) | -0.344<br>(0.03) | 0.212<br>(0.018)                        | 0.284<br>(0.013) | 0.252<br>(0.033) | 1.331<br>(0.179) | -0.059<br>(0.05)  | 0.325<br>(0.112) | -0.519<br>(0.072) |
| $G_c^b$          | -0.016<br>(0.049)          | 0.004<br>(0.015)  | 0.124<br>(0.296) | -0.672<br>(0.381) | 0.679<br>(0.018)             | 0.648<br>(0.053) | -0.085<br>(0.028) | 0.687<br>(0.012)      | 0.705<br>(0.04)  | -0.094<br>(0.03) | 0.178<br>(0.007)                        | 0.516<br>(0.02)  | 0.425<br>(0.1)   | 0.803<br>(0.126) | -0.095<br>(0.048) | 0.193<br>(0.077) | -0.425<br>(0.102) |

$\rho_{F_i,F_s}^a = 0.9$  ( $p < 0.001$ ),  $\rho_{F_i,F_q}^a = -2.013$  ( $p = 0.011$ ),  $\rho_{F_s,F_q}^a = -0.869$  ( $p < 0.001$ ).

1. The variance of  $F_i$ ,  $F_s$  and  $F_q$  were fixed to 1.0 to define the metrics of the latent growth factors.
2. We specified time-based growth curve modelling, such that the basis coefficients for each of the five slopes were set to the time in 25-years steps from baseline to each assessment on variable w.
3. Each of the four cognitive outcomes was standardized by subtracting the mean of all datapoints at the baseline occasion and dividing by the standard deviation of the age and age<sup>2</sup> residuals of all the datapoints at baseline.

<sup>a</sup> 1<sup>st</sup> step: unconstrained factor of curves model excluding  $G_c$ .

<sup>b</sup> 2<sup>nd</sup> step: constrained factor of curves model including  $G_c$ .

**Table S12.** Parameter estimates from age-based factor of curves models in BETULA with logarithmic retest specification.

| Cognitive domain | Latent variable means (SE) |                  |                   |                   | Unstandardized loadings (SE) |                  |                  | Standardized loadings |                      |                  | Residual variances and covariances (SE) |                  |                  |                  |                   |                   |                   |
|------------------|----------------------------|------------------|-------------------|-------------------|------------------------------|------------------|------------------|-----------------------|----------------------|------------------|-----------------------------------------|------------------|------------------|------------------|-------------------|-------------------|-------------------|
|                  | $\mu_r$                    | $\mu_i$          | $\mu_s$           | $\mu_q$           | $F_i$                        | $F_s$            | $F_q$            | $F_i$                 | $F_s$                | $F_q$            | $\sigma^2_{e[t]}$                       | $\sigma^2_{ui}$  | $\sigma^2_{us}$  | $\sigma^2_{uq}$  | $\sigma_{ui,us}$  | $\sigma_{ui,uq}$  | $\sigma_{us,uq}$  |
| $G_v^a$          | 0.232<br>(0.017)           | 0.571<br>(0.021) | -1.007<br>(0.04)  | -0.525<br>(0.031) | 0.603<br>(0.031)             | 0.163<br>(0.091) | 0.262<br>(0.066) | 0.646<br>(0.029)      | 0.75<br>(0.197)      | 0.826<br>(0.148) | 0.267<br>(0.007)                        | 0.509<br>(0.036) | 0.021<br>(0.01)  | 0.032<br>(0.031) | -0.020<br>(0.025) | -0.105<br>(0.037) | -0.001<br>(0.033) |
| $G_m^a$          | 0.281<br>(0.02)            | 0.594<br>(0.02)  | -0.823<br>(0.039) | -0.694<br>(0.034) | 0.478<br>(0.03)              | 0.163<br>(0.082) | 0.255<br>(0.07)  | 0.708<br>(0.037)      | 0.578<br>(0.182)     | 0.891<br>(0.054) | 0.515<br>(0.012)                        | 0.227<br>(0.028) | 0.074<br>(0.027) | 0.017<br>(0.004) | 0.057<br>(0.023)  | -0.036<br>(0.042) | -0.032<br>(0.031) |
| $G_s^a$          | 0.27<br>(0.021)            | 0.998<br>(0.027) | -1.043<br>(0.055) | -0.871<br>(0.041) | 0.653<br>(0.035)             | 0.421<br>(0.121) | 0.311<br>(0.16)  | 0.76<br>(0.032)       | 0.697<br>(0.12)      | 0.657<br>(0.215) | 0.211<br>(0.019)                        | 0.311<br>(0.04)  | 0.188<br>(0.06)  | 0.128<br>(0.034) | 0.017<br>(0.036)  | -0.083<br>(0.056) | -0.154<br>(0.038) |
| $G_c^b$          | 0.236<br>(0.015)           | 0.350<br>(0.016) | -0.175<br>(0.031) | -0.608<br>(0.027) | 0.617<br>(0.025)             | 0.308<br>(0.031) | 0.225<br>(0.049) | 0.757<br>(0.021)      | 0.773<br>(0.041)     | 0.403<br>(0.095) | 0.163<br>(0.006)                        | 0.283<br>(0.025) | 0.064<br>(0.012) | 0.261<br>(0.07)  | 0.110<br>(0.029)  | -0.075<br>(0.034) | -0.080<br>(0.057) |
|                  | Retest Basis coefficients  |                  |                   |                   |                              |                  |                  |                       | Implied retest means |                  |                                         |                  |                  |                  |                   |                   |                   |
|                  |                            | T1               | T2                | T3                | T4                           |                  |                  |                       |                      |                  | T1                                      | T2               | T3               | T4               |                   |                   |                   |
| $G_v^a$          |                            | 0                | 0.693             | 1.099             | 1.386                        |                  |                  |                       |                      |                  | 0                                       | 0.161            | 0.255            | 0.322            |                   |                   |                   |
| $G_m^a$          |                            | 0                | 0.693             | 1.099             | 1.386                        |                  |                  |                       |                      |                  | 0                                       | 0.187            | 0.297            | 0.374            |                   |                   |                   |
| $G_s^a$          |                            | 0                | 0.693             | 1.099             | 1.386                        |                  |                  |                       |                      |                  | 0                                       | 0.195            | 0.309            | 0.390            |                   |                   |                   |
| $G_c^b$          |                            | 0                | 0.693             | 1.099             | 1.386                        |                  |                  |                       |                      |                  | 0                                       | 0.164            | 0.259            | 0.327            |                   |                   |                   |

$\rho_{F_i,F_s}^a = 0.302$  ( $p=0.142$ ),  $\rho_{F_i,F_q}^a = -0.596$  ( $p<0.001$ ),  $\rho_{F_s,F_q}^a = 0.193$  ( $p=0.784$ ).

1. The variance of  $F_i$ ,  $F_s$  and  $F_q$  were fixed to 1.0 to define the metrics of the latent growth factors.

2. We specified age-based growth curve modelling, such that the basis coefficients for each of the five slopes were set to the age in decades of individual  $n$  at each assessment on variable  $w$ , centered at 50 years.

3. Each of the five cognitive outcomes was standardized by subtracting the mean of all datapoints at the baseline occasion and dividing by the standard deviation of the age and age<sup>2</sup> residuals of all the datapoints at baseline.

<sup>a</sup> 1<sup>st</sup> step: unconstrained factor of curves model excluding  $G_c$ .

<sup>b</sup> 2<sup>nd</sup> step: constrained factor of curves model including  $G_c$ .

**Table S13.** Parameter estimates from age-based factor of curves models in BETULA with latent basis retest specification.

| Cognitive domain | Latent variable means (SE) |                  |                   |                           | Unstandardized loadings (SE) |                  |                  | Standardized loadings |                  |                  | Residual variances and covariances (SE) |                      |                  |                  |                   |                   |                   |
|------------------|----------------------------|------------------|-------------------|---------------------------|------------------------------|------------------|------------------|-----------------------|------------------|------------------|-----------------------------------------|----------------------|------------------|------------------|-------------------|-------------------|-------------------|
|                  | $\mu_r$                    | $\mu_i$          | $\mu_s$           | $\mu_q$                   | $F_i$                        | $F_s$            | $F_q$            | $F_i$                 | $F_s$            | $F_q$            | $\sigma^2_{e[t]}$                       | $\sigma^2_{ui}$      | $\sigma^2_{us}$  | $\sigma^2_{uq}$  | $\sigma_{ui,us}$  | $\sigma_{ui,uq}$  | $\sigma_{us,uq}$  |
| $G_v^a$          | 0.103<br>(0.016)           | 0.592<br>(0.022) | -1.029<br>(0.04)  | -0.524<br>(0.031)         | 0.608<br>(0.031)             | 0.142<br>(0.089) | 0.266<br>(0.064) | 0.648<br>(0.029)      | 0.732<br>(0.224) | 0.827<br>(0.155) | 0.265<br>(0.007)                        | 0.509<br>(0.036)     | 0.018<br>(0.009) | 0.033<br>(0.034) | -0.017<br>(0.026) | -0.107<br>(0.037) | -0.001<br>(0.034) |
| $G_m^a$          | 0.148<br>(0.021)           | 0.607<br>(0.02)  | -0.842<br>(0.039) | -0.696<br>(0.034)         | 0.479<br>(0.03)              | 0.180<br>(0.079) | 0.253<br>(0.069) | 0.708<br>(0.037)      | 0.555<br>(0.186) | 0.887<br>(0.056) | 0.514<br>(0.012)                        | 0.228<br>(0.028)     | 0.072<br>(0.027) | 0.017<br>(0.004) | 0.056<br>(0.023)  | -0.036<br>(0.042) | -0.032<br>(0.031) |
| $G_s^a$          | 0.215<br>(0.019)           | 1.000<br>(0.027) | -1.055<br>(0.056) | -0.873<br>(0.041)         | 0.652<br>(0.035)             | 0.408<br>(0.127) | 0.308<br>(0.164) | 0.758<br>(0.032)      | 0.680<br>(0.132) | 0.650<br>(0.223) | 0.211<br>(0.019)                        | 0.314<br>(0.04)      | 0.194<br>(0.064) | 0.13<br>(0.036)  | 0.016<br>(0.036)  | -0.084<br>(0.057) | -0.157<br>(0.039) |
| $G_c^b$          | 0.148<br>(0.013)           | 0.371<br>(0.016) | -0.251<br>(0.03)  | -0.628<br>(0.027)         | 0.609<br>(0.025)             | 0.375<br>(0.034) | 0.201<br>(0.051) | 0.749<br>(0.021)      | 1.467<br>(0.15)  | 1.085<br>(0.124) | 0.162<br>(0.006)                        | 0.289<br>(0.025)     | 0.032<br>(0.006) | 0.275<br>(0.07)  | 0.113<br>(0.029)  | -0.084<br>(0.034) | -0.088<br>(0.058) |
|                  |                            |                  |                   | Retest Basis coefficients |                              |                  |                  |                       |                  |                  |                                         | Implied retest means |                  |                  |                   |                   |                   |
|                  |                            |                  |                   | T1                        | T2                           | T3               | T4               |                       |                  |                  |                                         | T1                   | T2               | T3               | T4                |                   |                   |
| $G_v^a$          |                            |                  |                   |                           | 0                            | 1                | 2.34<br>(0.324)  | 3.811<br>(0.539)      |                  |                  |                                         |                      | 0                | 0.071            | 0.113             | 0.143             |                   |
| $G_m^a$          |                            |                  |                   |                           | 0                            | 1                | 2.236<br>(0.304) | 2.8<br>(0.362)        |                  |                  |                                         |                      | 0                | 0.103            | 0.163             | 0.205             |                   |
| $G_s^a$          |                            |                  |                   |                           | 0                            | 1                | 1.363<br>(0.135) | 1.863<br>(0.189)      |                  |                  |                                         |                      | 0                | 0.149            | 0.236             | 0.298             |                   |
| $G_c^b$          |                            |                  |                   |                           | 0                            | 1                | 1.984<br>(0.157) | 3.022<br>(0.234)      |                  |                  |                                         |                      | 0                | 0.103            | 0.163             | 0.205             |                   |

$\rho_{F_i,F_s}^a = 0.324$  ( $p=0.151$ ),  $\rho_{F_i,F_q}^a = -0.594$  ( $p<0.001$ ),  $\rho_{F_s,F_q}^a = 0.230$  ( $p=0.755$ ).

1. The variance of  $F_i$ ,  $F_s$  and  $F_q$  were fixed to 1.0 to define the metrics of the latent growth factors.

2. We specified age-based growth curve modelling, such that the basis coefficients for each of the five slopes were set to the age in decades of individual  $n$  at each assessment on variable  $w$ , centered at 50 years.

3. Each of the five cognitive outcomes was standardized by subtracting the mean of all datapoints at the baseline occasion and dividing by the standard deviation of the age and age<sup>2</sup> residuals of all the datapoints at baseline.

<sup>a</sup> 1<sup>st</sup> step: unconstrained factor of curves model excluding  $G_c$ .

<sup>b</sup> 2<sup>nd</sup> step: constrained factor of curves model including  $G_c$ .

**Table S14.** Parameter estimates from age-based factor of curves models in BETULA with constant retest specification for observations made at ages less than or equal to age 65 years.

| Cognitive domain | Latent variable means (SE) |                  |                   |                   | Unstandardized loadings (SE) |                  |                  | Standardized loadings |                  |                  | Residual variances and covariances (SE) |                  |                  |                  |                   |                   |                  |
|------------------|----------------------------|------------------|-------------------|-------------------|------------------------------|------------------|------------------|-----------------------|------------------|------------------|-----------------------------------------|------------------|------------------|------------------|-------------------|-------------------|------------------|
|                  | $\mu_r$                    | $\mu_i$          | $\mu_s$           | $\mu_q$           | $F_i$                        | $F_s$            | $F_q$            | $F_i$                 | $F_s$            | $F_q$            | $\sigma^2_{e[t]}$                       | $\sigma^2_{ui}$  | $\sigma^2_{us}$  | $\sigma^2_{uq}$  | $\sigma_{ui,us}$  | $\sigma_{ui,uq}$  | $\sigma_{us,uq}$ |
| $G_v^a$          | 0.182<br>(0.021)           | 0.526<br>(0.026) | -0.873<br>(0.053) | -0.366<br>(0.081) | 0.590<br>(0.033)             | 0.153<br>(0.301) | 0.135<br>(0.55)  | 0.635<br>(0.030)      | 0.574<br>(0.958) | 0.592<br>(1.726) | 0.240<br>(0.009)                        | 0.515<br>(0.037) | 0.048<br>(0.097) | 0.034<br>(0.202) | -0.01<br>(0.035)  | -0.061<br>(0.088) | 0.003<br>(0.084) |
| $G_m^a$          | 0.231<br>(0.026)           | 0.534<br>(0.025) | -0.738<br>(0.046) | -0.386<br>(0.088) | 0.462<br>(0.038)             | 0.211<br>(0.083) | 0.196<br>(0.206) | 0.707<br>(0.048)      | 0.718<br>(0.152) | 1.000            | 0.508<br>(0.016)                        | 0.213<br>(0.032) | 0.042<br>(0.019) | 0.000<br>(0.000) | 0.031<br>(0.051)  | 0.015<br>(0.071)  | 0.002<br>(0.125) |
| $G_s^a$          | 0.188<br>(0.026)           | 0.903<br>(0.031) | -0.956<br>(0.063) | -0.463<br>(0.106) | 0.627<br>(0.039)             | 0.293<br>(0.375) | 0.11<br>(0.225)  | 0.737<br>(0.039)      | 0.597<br>(0.561) | 0.248<br>(0.468) | 0.209<br>(0.035)                        | 0.337<br>(0.048) | 0.155<br>(0.099) | 0.184<br>(0.097) | -0.008<br>(0.065) | -0.126<br>(0.091) | -0.145<br>(0.15) |
| $G_c^b$          | 0.100<br>(0.016)           | 0.316<br>(0.018) | 0.039<br>(0.035)  | -0.276<br>(0.053) | 0.572<br>(0.024)             | 0.305<br>(0.054) | 0.012<br>(0.112) | 0.741<br>(0.023)      | 0.866<br>(0.090) | 0.039<br>(0.362) | 0.117<br>(0.005)                        | 0.268<br>(0.025) | 0.031<br>(0.022) | 0.095<br>(0.05)  | 0.053<br>(0.024)  | 0.062<br>(0.049)  | 0.01<br>(0.058)  |

$\rho_{F_i,F_s}^a = 0.4$  ( $p=0.508$ ),  $\rho_{F_i,F_q}^a = -0.211$  ( $p=0.668$ ),  $\rho_{F_s,F_q}^a = -0.211$  ( $p=0.752$ ).

1. The variance of  $F_i$ ,  $F_s$ , and  $F_q$  were fixed to 1.0 to define the metrics of the latent growth factors.
2. We specified age-based growth curve modelling, such that the basis coefficients for each of the five slopes were set to the age in 25-year steps of individual  $n$  at each assessment on variable  $w$ , centered at 50 years.
3. Each of the four cognitive outcomes was standardized by subtracting the mean of all datapoints at the baseline occasion and dividing by the standard deviation of the age and age<sup>2</sup> residuals of all the datapoints at baseline.

<sup>a</sup> 1<sup>st</sup> step: unconstrained factor of curves model excluding  $G_c$ .

<sup>b</sup> 2<sup>nd</sup> step: constrained factor of curves model including  $G_c$ .
